# Supplementary material
Source: MDPI journal article supplement (https://www.mdpi.com/2071-1050/13/22/12694)
Supplement: s1 [file s1]

**Table S1. Landsat images used for compositing for 2000, 2005, 2010, 2015, and 2020**

| Year | Datasets                             | Date                                                                       | Paths | Raws | Number | Total of images |
|------|--------------------------------------|----------------------------------------------------------------------------|-------|------|--------|-----------------|
| 2000 | Landsat 7 Surface Reflectance Tier 1 | 1999.03.01~1999.10.31;<br>2000.03.01~2000.10.31;<br>2001.03.01~2001.10.31; | 117   | 031  | 2      | 104             |
|      |                                      |                                                                            | 117   | 032  | 5      |                 |
|      |                                      |                                                                            | 118   | 030  | 8      |                 |
|      |                                      |                                                                            | 118   | 031  | 8      |                 |
|      |                                      |                                                                            | 118   | 032  | 11     |                 |
|      |                                      |                                                                            | 119   | 030  | 13     |                 |
|      |                                      |                                                                            | 119   | 031  | 11     |                 |
|      |                                      |                                                                            | 119   | 032  | 13     |                 |
|      |                                      |                                                                            | 120   | 030  | 11     |                 |
|      |                                      |                                                                            | 120   | 031  | 11     |                 |
|      |                                      |                                                                            | 120   | 032  | 11     |                 |
| 2005 | Landsat 7 Surface Reflectance Tier 1 | 2004.03.01~2004.10.31;<br>2005.03.01~2005.10.31;<br>2006.03.01~2006.10.31; | 117   | 031  | 9      | 139             |
|      |                                      |                                                                            | 117   | 032  | 12     |                 |
|      |                                      |                                                                            | 118   | 030  | 13     |                 |
|      |                                      |                                                                            | 118   | 031  | 12     |                 |
|      |                                      |                                                                            | 118   | 032  | 14     |                 |
|      |                                      |                                                                            | 119   | 030  | 11     |                 |
|      |                                      |                                                                            | 119   | 031  | 14     |                 |
|      |                                      |                                                                            | 119   | 032  | 16     |                 |
|      |                                      |                                                                            | 120   | 030  | 16     |                 |
|      |                                      |                                                                            | 120   | 031  | 12     |                 |
|      |                                      |                                                                            | 120   | 032  | 10     |                 |
| 2010 | Landsat 7 Surface Reflectance Tier 1 | 2009.03.01~2009.10.31;<br>2010.03.01~2010.10.31;<br>2011.03.01~2011.10.31; | 117   | 031  | 8      | 128             |
|      |                                      |                                                                            | 117   | 032  | 10     |                 |
|      |                                      |                                                                            | 118   | 030  | 10     |                 |
|      |                                      |                                                                            | 118   | 031  | 8      |                 |
|      |                                      |                                                                            | 118   | 032  | 8      |                 |
|      |                                      |                                                                            | 119   | 030  | 13     |                 |
|      |                                      |                                                                            | 119   | 031  | 14     |                 |
|      |                                      |                                                                            | 119   | 032  | 13     |                 |
|      |                                      |                                                                            | 120   | 030  | 15     |                 |
|      |                                      |                                                                            | 120   | 031  | 15     |                 |
|      |                                      |                                                                            | 120   | 032  | 14     |                 |
| 2015 | Landsat 8 Surface Tier 1             | 2014.03.01~2014.10.31;<br>2015.03.01~2015.10.31;<br>2016.03.01~2016.10.31; | 117   | 031  | 9      | 162             |
|      |                                      |                                                                            | 117   | 032  | 11     |                 |
|      |                                      |                                                                            | 118   | 030  | 19     |                 |
|      |                                      |                                                                            | 118   | 031  | 16     |                 |
|      |                                      |                                                                            | 118   | 032  | 14     |                 |
|      |                                      |                                                                            | 119   | 030  | 19     |                 |
|      |                                      |                                                                            | 119   | 031  | 19     |                 |
|      |                                      |                                                                            | 119   | 032  | 13     |                 |
|      |                                      |                                                                            | 120   | 030  | 14     |                 |
|      |                                      |                                                                            | 120   | 031  | 15     |                 |
|      |                                      |                                                                            | 120   | 032  | 13     |                 |
| 2020 | Landsat 8 Surface Tier 1             | 2019.03.01~2019.10.31;<br>2020.03.01~2020.10.31;<br>2021.03.01~2021.06.31; | 117   | 031  | 8      | 100             |
|      |                                      |                                                                            | 117   | 032  | 9      |                 |
|      |                                      |                                                                            | 118   | 030  | 8      |                 |
|      |                                      |                                                                            | 118   | 031  | 8      |                 |
|      |                                      |                                                                            | 118   | 032  | 7      |                 |
|      |                                      |                                                                            | 119   | 030  | 13     |                 |
|      |                                      |                                                                            | 119   | 031  | 12     |                 |
|      |                                      |                                                                            | 119   | 032  | 10     |                 |
|      |                                      |                                                                            | 120   | 030  | 7      |                 |
|      |                                      |                                                                            | 120   | 031  | 10     |                 |
|      |                                      |                                                                            | 120   | 032  | 8      |                 |

**Table S2. Land-use type description[1-3]**

|   | Land-use type | Description                                                                                                                                                        |
|---|---------------|--------------------------------------------------------------------------------------------------------------------------------------------------------------------|
| 1 | Water body    | Rivers, streams, lakes, reservoirs, and fish ponds, etc                                                                                                            |
| 2 | Forest land   | Natural forest, secondary forest, and artificial forest, etc                                                                                                       |
| 3 | Built-up area | Land used for residential, industrial, commercial, and transportation purposes, including settlements, factories, quarries, mining, transportation facilities, etc |
| 4 | Cropland      | paddy field, glebe field                                                                                                                                           |
| 5 | Grassland     | Natural grassland and constructed grassland and meadow, etc                                                                                                        |
| 6 | Unused land   | Lands unused or difficult to use, including sandy land, saline land, bare land, and others                                                                         |

Table S3. Equivalent value per unit area of land-use type for ecosystem service values

| land-use type | Provision service |                     |              | Regulation service |                    |                           |                      | Support service |                  | Cultural service   |                     |
|---------------|-------------------|---------------------|--------------|--------------------|--------------------|---------------------------|----------------------|-----------------|------------------|--------------------|---------------------|
|               | Food supply       | Raw material supply | Water supply | Air regulation     | Climate regulation | Purifying the environment | Hydrology adjustment | Soil formation  | Nutrient cycling | Biological control | Culture and amenity |
| Water body    | 0.8               | 0.23                | 8.29         | 0.77               | 2.29               | 5.55                      | 102.24               | 0.93            | 0.07             | 2.55               | 1.89                |
| Forest land   | 0.31              | 0.71                | 0.37         | 2.35               | 7.03               | 1.99                      | 3.51                 | 2.86            | 0.22             | 2.6                | 1.14                |
| Build-up area | 0                 | 0                   | 0            | 0                  | 0                  | 0                         | 0                    | 0               | 0                | 0                  | 0                   |
| Cropland      | 0.85              | 0.4                 | 0.02         | 0.67               | 0.36               | 0.1                       | 0.27                 | 1.03            | 0.12             | 0.13               | 0.06                |
| Grassland     | 0.23              | 0.34                | 0.19         | 1.21               | 3.19               | 1.05                      | 2.34                 | 1.47            | 0.11             | 1.34               | 0.59                |
| Unused land   | 0                 | 0                   | 0            | 0.02               | 0                  | 0.1                       | 0.03                 | 0.02            | 0                | 0.02               | 0.01                |

**Table S4. Statistical summary of land-use changes for 2000-2005, 2005-2010, 2010-2015, 2015-2020, and 2000-2020**

| Land-use type | 2000-2005 |       | 2005-2010 |       | 2010-2015 |        | 2015-2020 |        | 2000-2020 |        |
|---------------|-----------|-------|-----------|-------|-----------|--------|-----------|--------|-----------|--------|
|               | area      | %     | area      | %     | area      | %      | area      | %      | area      | %      |
| Water         | 110.97    | 15.18 | -19.98    | -2.37 | 51.95     | 6.32   | -57.13    | -6.54  | 85.81     | 11.74  |
| Forest land   | -101.38   | -0.48 | -119.14   | -0.57 | -342.33   | -1.64  | 46.54     | 0.23   | -516.32   | -2.44  |
| Build-up land | 310.92    | 11.4  | 495.38    | 16.31 | 548.10    | 15.51  | 520.03    | 12.74  | 1874.43   | 68.74  |
| Cropland      | -475.36   | -2.25 | -363.97   | -1.76 | -107.16   | -0.53  | -358.60   | -1.78  | -1305.09  | -6.18  |
| Grassland     | 151.17    | 20.59 | -40.59    | -4.59 | -172.68   | -20.44 | -139.56   | -20.77 | -201.66   | -27.47 |
| Unused land   | 3.92      | 3.42  | 47.88     | 40.47 | 21.45     | 12.91  | -28.04    | -14.94 | 45.21     | 39.52  |

Area: km<sup>3</sup>; %: change by proportion.

**Table S5. Total ecosystem service values by land-use type**

| Land-use type | 2000   |        | 2005    |        | 2010    |        | 2015    |        | 2020    |        |
|---------------|--------|--------|---------|--------|---------|--------|---------|--------|---------|--------|
|               | value  | %      | value   | %      | value   | %      | value   | %      | value   | %      |
| Water         | 94.54  | 11.61  | 227.31  | 14.70  | 226.49  | 17.64  | 163.01  | 14.23  | 207.95  | 15.64  |
| Forest land   | 628.28 | 77.18  | 1161.66 | 75.10  | 932.61  | 72.65  | 859.56  | 75.02  | 993.85  | 74.74  |
| Build-up land | 0.00   | 0.00   | 0.00    | 0.00   | 0.00    | 0.00   | 0.00    | 0.00   | 0.00    | 0.00   |
| Cropland      | 80.87  | 9.93   | 135.68  | 8.77   | 108.46  | 8.45   | 110.64  | 9.66   | 116.98  | 8.80   |
| Grassland     | 10.33  | 1.27   | 22.14   | 1.43   | 16.17   | 1.26   | 12.51   | 1.09   | 10.99   | 0.83   |
| Unused land   | 0.02   | 0.00   | 0.03    | 0.00   | 0.04    | 0.00   | 0.05    | 0.00   | 0.05    | 0.00   |
| Total         | 814.04 | 100.00 | 1546.82 | 100.00 | 1283.78 | 100.00 | 1145.76 | 100.00 | 1329.81 | 100.00 |

Value: hundred million Chinese Yuan; %: proportion.

Table S6. Ecosystem service values by ecosystem service functions

| Land use type         | 2000   |       | 2005    |       | 2010    |       | 2015    |       | 2020    |       |
|-----------------------|--------|-------|---------|-------|---------|-------|---------|-------|---------|-------|
|                       | value  | %     | value   | %     | value   | %     | value   | %     | value   | %     |
| Food supply           | 38.27  | 4.7   | 52.65   | 3.4   | 40.72   | 3.17  | 48.02   | 4.19  | 48.86   | 3.67  |
| Raw material          | 28.25  | 3.47  | 50.23   | 3.25  | 38.05   | 2.96  | 38.25   | 3.34  | 41.54   | 3.12  |
| Water supply          | 17.18  | 2.11  | 39.2    | 2.53  | 39.65   | 3.09  | 26.37   | 2.3   | 35.62   | 2.68  |
| Gas regulation        | 81.34  | 9.99  | 144.94  | 9.37  | 109.23  | 8.51  | 109.73  | 9.58  | 119.89  | 9.02  |
| Climate regulation    | 212.13 | 26.06 | 378.8   | 24.49 | 283.93  | 22.12 | 285.13  | 24.89 | 313.81  | 23.6  |
| Purifying environment | 62.12  | 7.63  | 111.49  | 7.21  | 83.51   | 6.51  | 84.25   | 7.35  | 92.39   | 6.95  |
| Hydrology adjustment  | 183.95 | 22.6  | 422.46  | 27.31 | 427.13  | 33.27 | 285.68  | 24.93 | 383.82  | 28.86 |
| Soil formation        | 67.79  | 8.33  | 127.05  | 8.21  | 96.6    | 7.52  | 102.43  | 8.94  | 111.74  | 8.4   |
| Nutrient cycling      | 8.68   | 1.07  | 15.44   | 1     | 11.69   | 0.91  | 11.75   | 1.03  | 12.77   | 0.96  |
| Biological control    | 79.22  | 9.73  | 141.69  | 9.16  | 106.16  | 8.27  | 106.73  | 9.32  | 117.32  | 8.82  |
| Culture & Recreation  | 35.1   | 4.31  | 62.87   | 4.06  | 47.1    | 3.67  | 47.42   | 4.14  | 52.07   | 3.92  |
| Total                 | 814.04 | 100   | 1546.82 | 100   | 1283.78 | 100   | 1145.76 | 100   | 1329.81 | 100   |

Value: hundred million Chinese Yuan; %: proportion.

**Table S7. Ecosystem service values changes by land-use type**

| Land use type | 2000-2005 |        | 2005-2010 |        | 2010-2015 |        | 2015-2020 |       | 2000-2020 |        |
|---------------|-----------|--------|-----------|--------|-----------|--------|-----------|-------|-----------|--------|
|               | value     | %      | value     | %      | value     | %      | value     | %     | value     | %      |
| Water         | 132.77    | 140.44 | -0.82     | -0.36  | -63.48    | -28.03 | 44.94     | 27.57 | 113.41    | 119.96 |
| Forestland    | 533.38    | 84.9   | -229.1    | -19.72 | -73.05    | -7.83  | 134.3     | 15.62 | 365.57    | 58.19  |
| Build-up area | 0         | 0      | 0         | 0      | 0         | 0      | 0         | 0     | 0         | 0      |
| Cropland      | 54.81     | 67.78  | -27.22    | -20.06 | 2.18      | 2.01   | 6.34      | 5.73  | 36.11     | 44.65  |
| Grassland     | 11.81     | 114.33 | -5.97     | -26.96 | -3.66     | -22.63 | -1.52     | -12.2 | 0.66      | 6.39   |
| Unused land   | 0.01      | 50     | 0.01      | 33.33  | 0.01      | 25     | 0         | 0     | 0.03      | 150    |
| TOTAL         | 732.78    | 90.02  | -263      | -17.01 | -138.02   | -10.75 | 184.1     | 16.06 | 515.77    | 63.36  |

Value: ecosystem service values (hundred million Chinese Yuan); %: proportion.

Table S8. Ecosystem service value changes by ecosystem service functions

| Ecosystem service function | 2000-2005 |        | 2005-2010 |        | 2010-2015 |        | 2015-2020 |       | 2000-2020 |        |
|----------------------------|-----------|--------|-----------|--------|-----------|--------|-----------|-------|-----------|--------|
|                            | value     | %      | value     | %      | value     | %      | value     | %     | value     | %      |
| Food supply                | 14.38     | 37.58  | -11.93    | -22.66 | 7.3       | 17.93  | 0.84      | 1.75  | 10.59     | 27.67  |
| Raw material               | 21.98     | 77.81  | -12.18    | -24.25 | 0.2       | 0.53   | 3.29      | 8.6   | 13.29     | 47.04  |
| Water supply               | 22.02     | 128.17 | 0.45      | 1.15   | -13.28    | -33.49 | 9.25      | 35.08 | 18.44     | 107.33 |
| Gas regulation             | 63.6      | 78.19  | -35.71    | -24.64 | 0.5       | 0.46   | 10.16     | 9.26  | 38.55     | 47.39  |
| Climate regulation         | 166.67    | 78.57  | -94.87    | -25.04 | 1.2       | 0.42   | 28.68     | 10.06 | 101.68    | 47.93  |
| Purifying environment      | 49.37     | 79.48  | -27.98    | -25.1  | 0.74      | 0.89   | 8.14      | 9.66  | 30.27     | 48.73  |
| Hydrology adjustment       | 238.51    | 129.66 | 4.67      | 1.11   | -141.45   | -33.12 | 98.14     | 34.35 | 199.87    | 108.65 |
| Soil formation             | 59.26     | 87.42  | -30.45    | -23.97 | 5.83      | 6.04   | 9.31      | 9.09  | 43.95     | 64.83  |
| Nutrient cycling           | 6.76      | 77.88  | -3.75     | -24.29 | 0.06      | 0.51   | 1.02      | 8.68  | 4.09      | 47.12  |
| Biological control         | 62.47     | 78.86  | -35.53    | -25.08 | 0.57      | 0.54   | 10.59     | 9.92  | 38.1      | 48.09  |
| Culture & Recreation       | 27.77     | 79.12  | -15.77    | -25.08 | 0.32      | 0.68   | 4.65      | 9.81  | 16.97     | 48.35  |
| TOTAL                      | 732.78    | 90.02  | -263      | -17.01 | -138.02   | -10.75 | 184.1     | 16.06 | 515.77    | 63.36  |

Value: hundred million Chinese Yuan; %: proportion.

**Table S9. Ecosystem service values of land use type for the five prefecture-level cities**

| City     | Land-use type | 2000   |       | 2005   |       | 2010   |       | 2015   |       | 2020   |       |
|----------|---------------|--------|-------|--------|-------|--------|-------|--------|-------|--------|-------|
|          |               | value  | %     |
| Shenyang | Water         | 27.31  | 37.8  | 69.46  | 46.24 | 71.18  | 52.09 | 62.21  | 49.71 | 68.2   | 50.24 |
|          | Forestland    | 7.29   | 10.09 | 11.37  | 7.57  | 9.21   | 6.74  | 11.16  | 8.92  | 12.65  | 9.32  |
|          | Build-up area | 0      | 0     | 0      | 0     | 0      | 0     | 0      | 0     | 0      | 0     |
|          | Cropland      | 37     | 51.22 | 68.12  | 45.35 | 53.83  | 39.4  | 50.49  | 40.34 | 51.58  | 38    |
|          | Grassland     | 0.64   | 0.88  | 1.27   | 0.84  | 2.43   | 1.78  | 1.29   | 1.03  | 3.31   | 2.44  |
|          | Unused land   | 0      | 0     | 0.01   | 0     | 0      | 0     | 0      | 0     | 0      | 0     |
|          | total         | 72.24  | 100   | 150.22 | 100   | 136.65 | 100   | 125.16 | 100   | 135.75 | 100   |
| Anshan   | Water         | 11.81  | 7.79  | 27.69  | 10.11 | 23.42  | 11.17 | 22.54  | 10.99 | 25.03  | 11.32 |
|          | Forestland    | 117.69 | 77.63 | 212.51 | 77.6  | 156.08 | 74.45 | 155.69 | 75.93 | 164.09 | 74.21 |
|          | Build-up area | 0      | 0     | 0      | 0     | 0      | 0     | 0      | 0     | 0      | 0     |
|          | Cropland      | 16.34  | 10.78 | 27.13  | 9.91  | 21.4   | 10.21 | 22.01  | 10.73 | 28.41  | 12.85 |
|          | Grassland     | 5.76   | 3.8   | 6.49   | 2.37  | 8.71   | 4.16  | 4.8    | 2.34  | 3.57   | 1.61  |
|          | Unused land   | 0.01   | 0     | 0.01   | 0     | 0.01   | 0.01  | 0.01   | 0.01  | 0.02   | 0.01  |
|          | total         | 151.6  | 100   | 273.84 | 100   | 209.63 | 100   | 205.05 | 100   | 221.12 | 100   |
| Fushun   | Water         | 13.89  | 5.08  | 36.76  | 6.87  | 34.79  | 7.86  | 22.52  | 5.7   | 32.31  | 7.12  |
|          | Forestland    | 245.6  | 89.87 | 477.06 | 89.1  | 391.64 | 88.47 | 353.73 | 89.46 | 404.12 | 89.09 |
|          | Build-up area | 0      | 0     | 0      | 0     | 0      | 0     | 0      | 0     | 0      | 0     |
|          | Cropland      | 12.61  | 4.61  | 17.38  | 3.25  | 14.7   | 3.32  | 16.42  | 4.15  | 15.75  | 3.47  |
|          | Grassland     | 1.18   | 0.43  | 4.24   | 0.79  | 1.54   | 0.35  | 2.72   | 0.69  | 1.41   | 0.31  |
|          | Unused land   | 0      | 0     | 0      | 0     | 0      | 0     | 0.01   | 0     | 0.01   | 0     |
|          | total         | 273.28 | 100   | 535.44 | 100   | 442.67 | 100   | 395.39 | 100   | 453.61 | 100   |
| Benxi    | Water         | 26.4   | 10.83 | 57.39  | 12.8  | 64.48  | 16.86 | 37.31  | 11.37 | 57.92  | 14.1  |
|          | Forestland    | 209.46 | 85.95 | 375.47 | 83.75 | 309.61 | 80.97 | 278.59 | 84.92 | 343.71 | 83.68 |
|          | Build-up area | 0      | 0     | 0      | 0     | 0      | 0     | 0      | 0     | 0      | 0     |
|          | Cropland      | 6.5    | 2.67  | 9.2    | 2.05  | 7.26   | 1.9   | 10.14  | 3.09  | 8.23   | 2     |
|          | Grassland     | 1.35   | 0.55  | 6.26   | 1.4   | 1.02   | 0.27  | 2.02   | 0.62  | 0.88   | 0.21  |
|          | Unused land   | 0.01   | 0     | 0.01   | 0     | 0.01   | 0     | 0.01   | 0     | 0.01   | 0     |
|          | total         | 243.71 | 100   | 448.33 | 100   | 382.39 | 100   | 328.07 | 100   | 410.76 | 100   |
| Liaoning | Water         | 15.12  | 20.7  | 35.97  | 25.92 | 32.6   | 29.03 | 18.42  | 20.01 | 24.48  | 22.55 |
|          | Forestland    | 48.13  | 65.89 | 85.11  | 61.35 | 65.98  | 58.77 | 60.36  | 65.58 | 69.28  | 63.8  |
|          | Build-up area | 0      | 0     | 0      | 0     | 0      | 0     | 0      | 0     | 0      | 0     |
|          | Cropland      | 8.39   | 11.49 | 13.79  | 9.94  | 11.23  | 10    | 11.57  | 12.57 | 13     | 11.97 |
|          | Grassland     | 1.41   | 1.92  | 3.87   | 2.79  | 2.46   | 2.19  | 1.68   | 1.83  | 1.81   | 1.67  |
|          | Unused land   | 0      | 0     | 0      | 0     | 0.01   | 0.01  | 0.01   | 0.01  | 0.01   | 0.01  |
|          | TOTAL         | 73.05  | 100   | 138.74 | 100   | 112.27 | 100   | 92.04  | 100   | 108.59 | 100   |

Value: hundred million Chinese Yuan; %: proportion.

Table S10. Ecosystem service values of ecosystem service function for the five prefecture-level cities

| City     | Ecosystem service functions | 2000<br>value | %     | 2005<br>value | %     | 2010<br>value | %     | 2015<br>value | %     | 2020<br>value | %     |
|----------|-----------------------------|---------------|-------|---------------|-------|---------------|-------|---------------|-------|---------------|-------|
| Shenyang | Food supply                 | 14.51         | 20.08 | 23.06         | 15.35 | 17.73         | 12.97 | 18.55         | 14.82 | 18.64         | 13.73 |
|          | Raw material supply         | 3.46          | 4.79  | 6.71          | 4.47  | 5.24          | 3.82  | 4.89          | 3.91  | 4.98          | 3.66  |
|          | Water supply                | 2.25          | 3.11  | 5.53          | 3.69  | 5.75          | 4.2   | 4.84          | 3.87  | 5.48          | 4.03  |
|          | Air regulation              | 6.25          | 8.65  | 11.98         | 7.99  | 9.41          | 6.87  | 8.92          | 7.14  | 9.22          | 6.78  |
|          | Climate regulation          | 5.57          | 7.7   | 10.06         | 6.71  | 8.11          | 5.92  | 8.36          | 6.69  | 9.17          | 6.74  |
|          | Purifying environment       | 2.08          | 2.88  | 4.14          | 2.76  | 3.29          | 2.4   | 3.63          | 2.9   | 3.76          | 2.76  |
|          | Hydrology adjustment        | 27.59         | 38.16 | 68.12         | 45.41 | 70.77         | 51.66 | 59.49         | 47.59 | 67.31         | 49.49 |
|          | Soil formation              | 6.21          | 8.59  | 12.42         | 8.28  | 9.81          | 7.16  | 9.75          | 7.8   | 10.02         | 7.37  |
|          | Nutrient cycling            | 1.04          | 1.44  | 2.02          | 1.35  | 1.58          | 1.15  | 1.47          | 1.18  | 1.5           | 1.1   |
|          | Biological control          | 2.22          | 3.07  | 4.14          | 2.76  | 3.33          | 2.43  | 3.51          | 2.81  | 3.8           | 2.79  |
|          | Culture and amenity         | 1.08          | 1.49  | 2.07          | 1.38  | 1.65          | 1.2   | 1.77          | 1.42  | 1.88          | 1.38  |
|          | Total                       | 72.26         | 100   | 150.25        | 100   | 136.67        | 100   | 125.18        | 100   | 135.76        | 100   |
| Anshan   | Food supply                 | 7.39          | 4.87  | 10.5          | 3.83  | 7.2           | 3.43  | 8.95          | 4.36  | 9.38          | 4.24  |
|          | Raw material supply         | 5.59          | 3.68  | 9.5           | 3.47  | 6.89          | 3.29  | 7.23          | 3.53  | 7.88          | 3.56  |
|          | Water supply                | 2.81          | 1.85  | 6.25          | 2.28  | 5.79          | 2.76  | 4.38          | 2.14  | 5.41          | 2.45  |
|          | Air regulation              | 15.97         | 10.53 | 27.1          | 9.89  | 19.41         | 9.25  | 20.46         | 9.98  | 21.53         | 9.74  |
|          | Climate regulation          | 41.1          | 27.09 | 69.79         | 25.47 | 49.09         | 23.41 | 52.21         | 25.46 | 52.74         | 23.85 |
|          | Purifying environment       | 12.08         | 7.96  | 20.55         | 7.5   | 14.43         | 6.88  | 15.52         | 7.57  | 15.56         | 7.04  |
|          | Hydrology adjustment        | 29.47         | 19.43 | 65.81         | 24.02 | 60.98         | 29.08 | 46.6          | 22.72 | 57.28         | 25.9  |
|          | Soil formation              | 13.35         | 8.8   | 23.84         | 8.7   | 17.26         | 8.23  | 19.18         | 9.35  | 20.41         | 9.23  |
|          | Nutrient cycling            | 1.72          | 1.13  | 2.92          | 1.07  | 2.12          | 1.01  | 2.22          | 1.08  | 2.42          | 1.09  |
|          | Biological control          | 15.4          | 10.15 | 26.13         | 9.54  | 18.4          | 8.77  | 19.6          | 9.56  | 19.74         | 8.93  |
|          | Culture and amenity         | 6.82          | 4.5   | 11.59         | 4.23  | 8.16          | 3.89  | 8.72          | 4.25  | 8.77          | 3.97  |
|          | Total                       | 151.7         | 100   | 273.98        | 100   | 209.73        | 100   | 205.07        | 100   | 221.12        | 100   |
| Fushun   | Food supply                 | 7.51          | 2.75  | 8.13          | 1.52  | 7.68          | 1.73  | 8.82          | 2.23  | 9.12          | 2.01  |
|          | Raw material supply         | 9.32          | 3.41  | 17.09         | 3.19  | 13.12         | 2.96  | 13.16         | 3.33  | 14.12         | 3.11  |
|          | Water supply                | 4.91          | 1.8   | 11.45         | 2.14  | 11.58         | 2.62  | 7.33          | 1.85  | 10.1          | 2.23  |
|          | Air regulation              | 28.75         | 10.52 | 53.51         | 9.99  | 41.01         | 9.26  | 40.79         | 10.32 | 44.15         | 9.73  |
|          | Climate regulation          | 80.61         | 29.5  | 152.18        | 28.42 | 116.51        | 26.32 | 114.94        | 29.07 | 125.51        | 27.67 |
|          | Purifying environment       | 23.09         | 8.45  | 43.7          | 8.16  | 33.41         | 7.55  | 33            | 8.35  | 36.07         | 7.95  |
|          | Hydrology adjustment        | 49.69         | 18.18 | 116.87        | 21.83 | 117.65        | 26.58 | 74.59         | 18.86 | 102.85        | 22.67 |
|          | Soil formation              | 23.44         | 8.58  | 45.81         | 8.56  | 35.38         | 7.99  | 37.22         | 9.41  | 40.2          | 8.86  |
|          | Nutrient cycling            | 2.88          | 1.05  | 5.28          | 0.99  | 4.05          | 0.91  | 4.06          | 1.03  | 4.36          | 0.96  |
|          | Biological control          | 29.91         | 10.94 | 56.52         | 10.56 | 43.24         | 9.77  | 42.68         | 10.79 | 46.61         | 10.28 |
|          | Culture and amenity         | 13.17         | 4.82  | 24.89         | 4.65  | 19.04         | 4.3   | 18.8          | 4.75  | 20.53         | 4.53  |
|          | Total                       | 273.28        | 100   | 535.43        | 100   | 442.67        | 100   | 395.39        | 100   | 453.62        | 100   |
| Benxi    | Food supply                 | 4.59          | 1.88  | 5.3           | 1.18  | 4.3           | 1.12  | 6.53          | 1.99  | 6.15          | 1.5   |
|          | Raw material supply         | 7.56          | 3.1   | 12.84         | 2.86  | 9.74          | 2.55  | 9.98          | 3.04  | 11.3          | 2.75  |
|          | Water supply                | 5.28          | 2.17  | 11.69         | 2.61  | 12.43         | 3.25  | 7.39          | 2.25  | 11.28         | 2.75  |
|          | Air regulation              | 23.87         | 9.79  | 40.89         | 9.12  | 31            | 8.11  | 31.33         | 9.55  | 36.04         | 8.77  |
|          | Climate regulation          | 68.49         | 28.1  | 117.96        | 26.31 | 89.56         | 23.42 | 89.32         | 27.23 | 104.33        | 25.4  |
|          | Purifying environment       | 19.88         | 8.16  | 34.2          | 7.63  | 26.05         | 6.81  | 25.95         | 7.91  | 30.35         | 7.39  |
|          | Hydrology adjustment        | 55.62         | 22.82 | 123.29        | 27.5  | 131.59        | 34.41 | 78            | 23.78 | 119.14        | 29    |
|          | Soil formation              | 19.32         | 7.93  | 34.84         | 7.77  | 26.61         | 6.96  | 28.49         | 8.68  | 32.63         | 7.94  |
|          | Nutrient cycling            | 2.33          | 0.96  | 3.97          | 0.89  | 3.01          | 0.79  | 3.08          | 0.94  | 3.49          | 0.85  |
|          | Biological control          | 25.51         | 10.47 | 43.96         | 9.81  | 33.37         | 8.73  | 33.28         | 10.14 | 38.87         | 9.46  |
|          | Culture and amenity         | 11.26         | 4.62  | 19.4          | 4.33  | 14.75         | 3.86  | 14.7          | 4.48  | 17.18         | 4.18  |
|          | Total                       | 243.71        | 100   | 448.34        | 100   | 382.41        | 100   | 328.05        | 100   | 410.76        | 100   |
| Liaoyang | Food supply                 | 4.27          | 5.84  | 5.66          | 4.08  | 3.81          | 3.39  | 5.16          | 5.61  | 5.57          | 5.13  |
|          | Raw material supply         | 2.32          | 3.17  | 4.1           | 2.95  | 3.06          | 2.72  | 3             | 3.26  | 3.26          | 3     |
|          | Water supply                | 1.93          | 2.64  | 4.28          | 3.08  | 4.1           | 3.65  | 2.42          | 2.63  | 3.35          | 3.09  |
|          | Air regulation              | 6.49          | 8.88  | 11.46         | 8.25  | 8.41          | 7.49  | 8.23          | 8.94  | 8.95          | 8.24  |
|          | Climate regulation          | 16.36         | 22.39 | 28.8          | 20.74 | 20.66         | 18.39 | 20.31         | 22.06 | 22.06         | 20.32 |
|          | Purifying environment       | 4.99          | 6.83  | 8.9           | 6.41  | 6.32          | 5.63  | 6.15          | 6.68  | 6.65          | 6.12  |
|          | Hydrology adjustment        | 21.57         | 29.52 | 48.37         | 34.84 | 46.15         | 41.09 | 26.99         | 29.32 | 37.25         | 34.31 |
|          | Soil formation              | 5.48          | 7.5   | 10.14         | 7.3   | 7.54          | 6.71  | 7.79          | 8.46  | 8.47          | 7.8   |
|          | Nutrient cycling            | 0.71          | 0.97  | 1.26          | 0.91  | 0.94          | 0.84  | 0.92          | 1     | 1             | 0.92  |
|          | Biological control          | 6.19          | 8.47  | 10.94         | 7.88  | 7.82          | 6.96  | 7.66          | 8.32  | 8.31          | 7.65  |
|          | Culture and amenity         | 2.77          | 3.79  | 4.92          | 3.54  | 3.51          | 3.13  | 3.43          | 3.73  | 3.71          | 3.42  |
|          | Total                       | 73.08         | 100   | 138.83        | 100   | 112.32        | 100   | 92.06         | 100   | 108.58        | 100   |

Value: hundred million Chinese Yuan; %: proportion.

## References

1. Xu, X.; Liu, J.; Zhang, S.; Li, R.; Yan, C.; Wu, S., eds. China Multi-period Land Use and Land Cover Remote Sensing Monitoring Data Set (CNLUCC) (<http://www.resdc.cn/DOI>): Data Registration and Publishing System of the Resource and Environmental Science Data Center of the Chinese Academy of Sciences, 2018.
2. He, Y.; Kuang, Y.; Zhao, Y.; Ruan, Z. Spatial Correlation between Ecosystem Services and Human Disturbances: A Case Study of the Guangdong–Hong Kong–Macao Greater Bay Area, China. *Remote Sens.-Basel*. **2021**, 13, 1174.
3. Ye, Y.; Zhang, J.; Wang, T.; Bai, H.; Wang, X.; Zhao, W. Changes in Land-Use and Ecosystem Service Value in Guangdong Province, Southern China, from 1990 to 2018. *Land*. **2021**, 10, 426.
